# Supplementary material for: Source apportionment of oxidative potential depends on the choice of the assay: insights into 5 protocols comparison and implications for mitigation measures
Source: Royal Society of Chemistry journal article supplement (doi:10.1039/d3ea00007a), 2023-01-01
Supplement: d3ea00007a1.pdf [file d3ea00007a1.pdf]

## **Supplementary Information of**

*Source apportionment of oxidative potential depends on the choice of the assay: insights into 5 protocols comparison and implications for mitigation measures*

*Dominutti et al.*

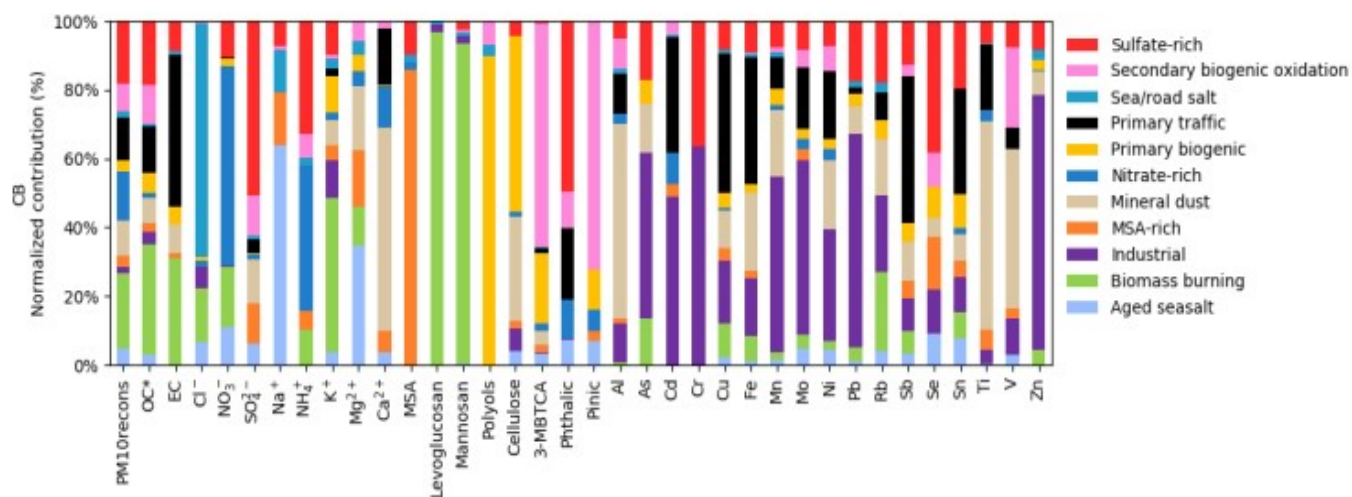

Figure S1. Species repartition among source profiles obtained at the Grenoble hyper-centre site (Borlaza et al., 2021a)

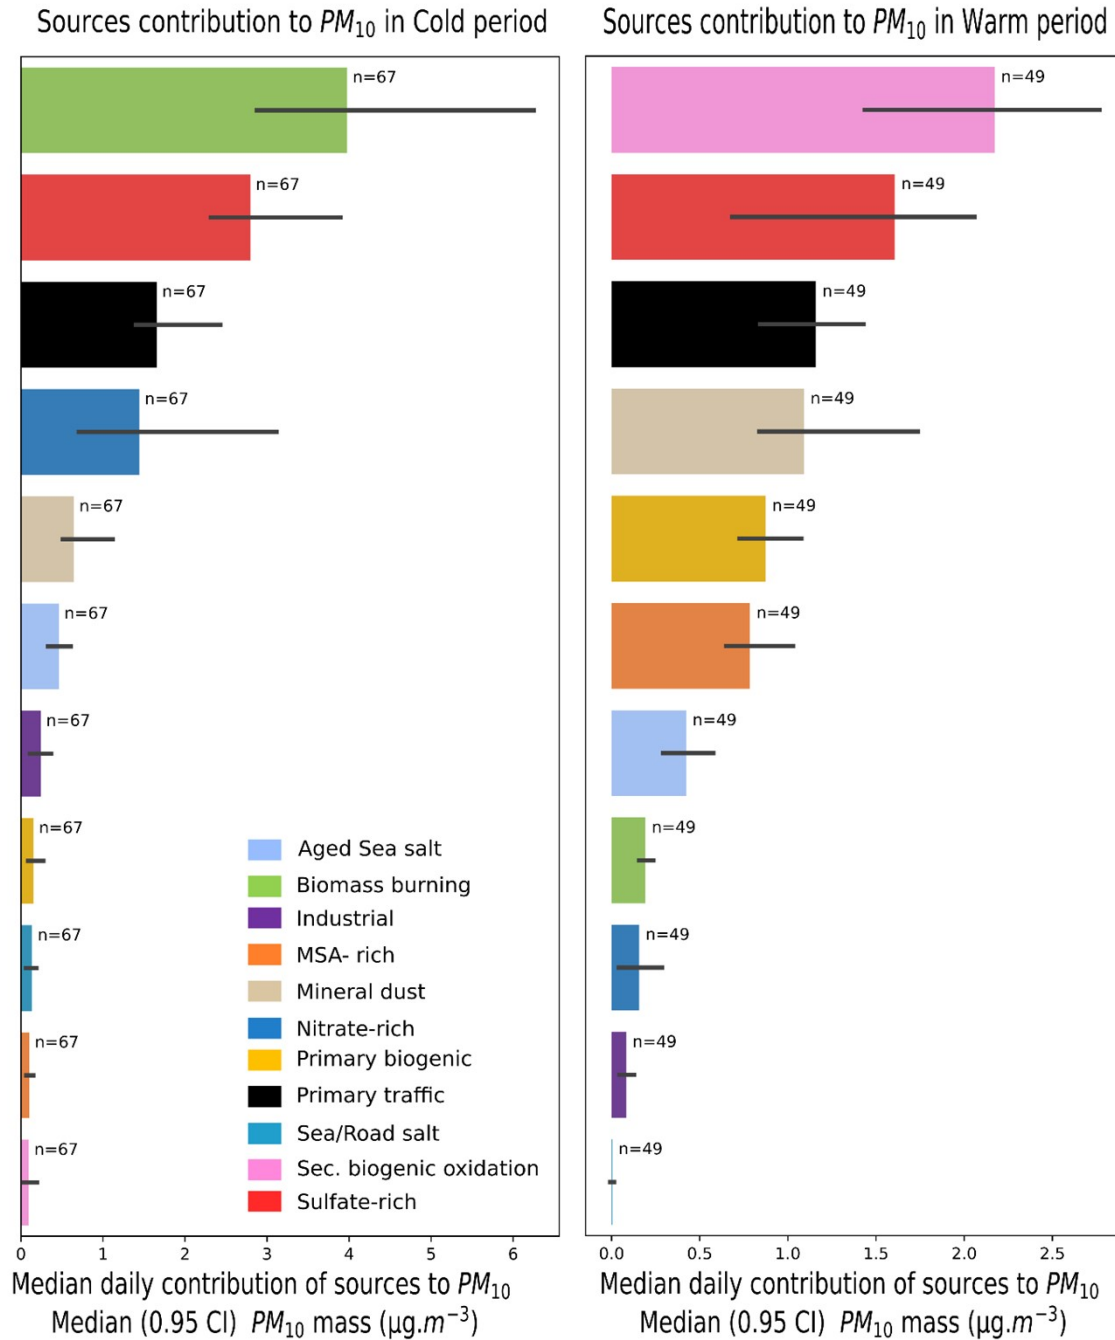

**Figure S2. Median daily contribution of  $PM_{10}$  sources separated on a seasonal basis. Left: median contribution considering cold months (November, December, January, February, and March). Right: median contribution considering warm months (May, June, July, August, and September).**

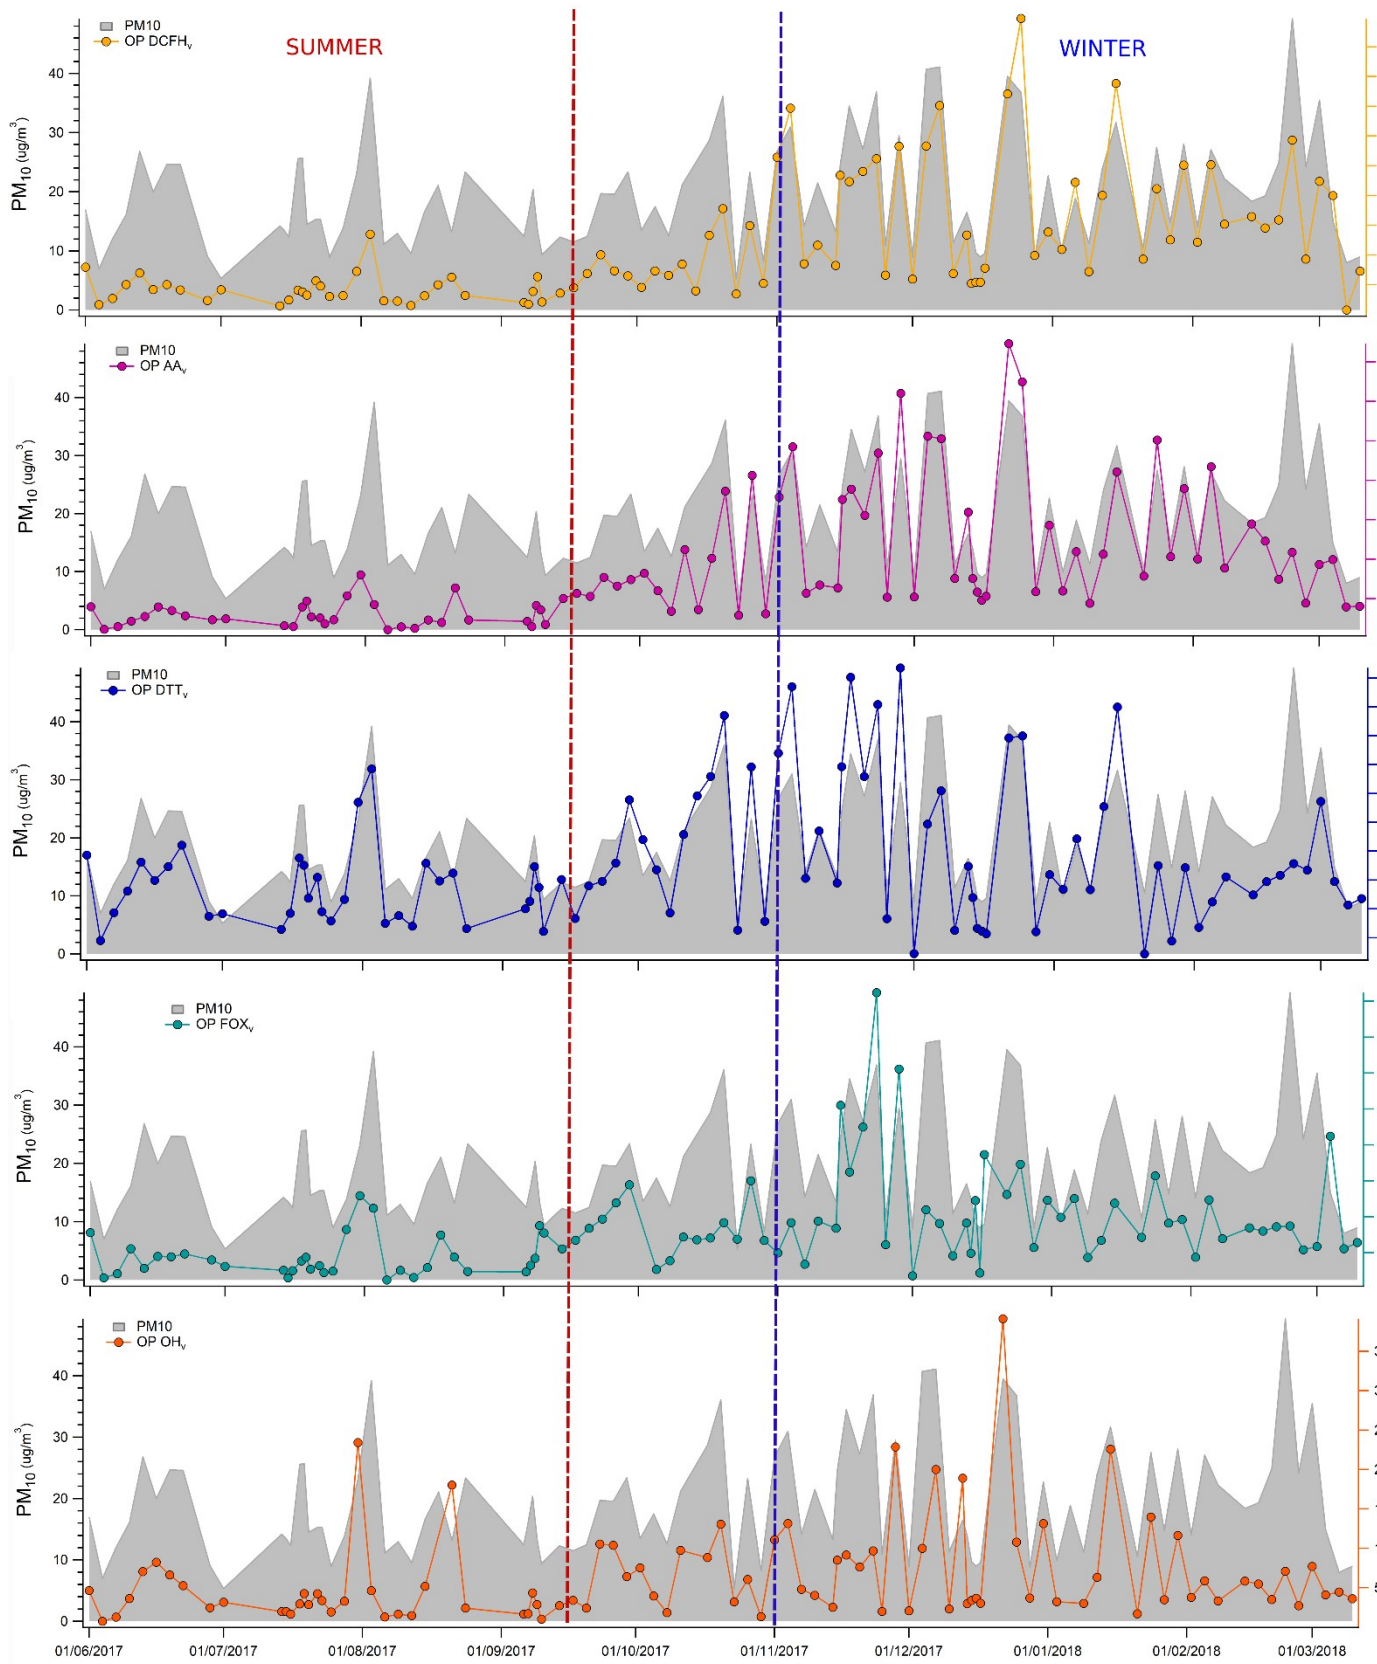

Figure S3. Timeseries of five OP<sub>v</sub> assays and PM<sub>10</sub> concentrations observed in Grenoble, France

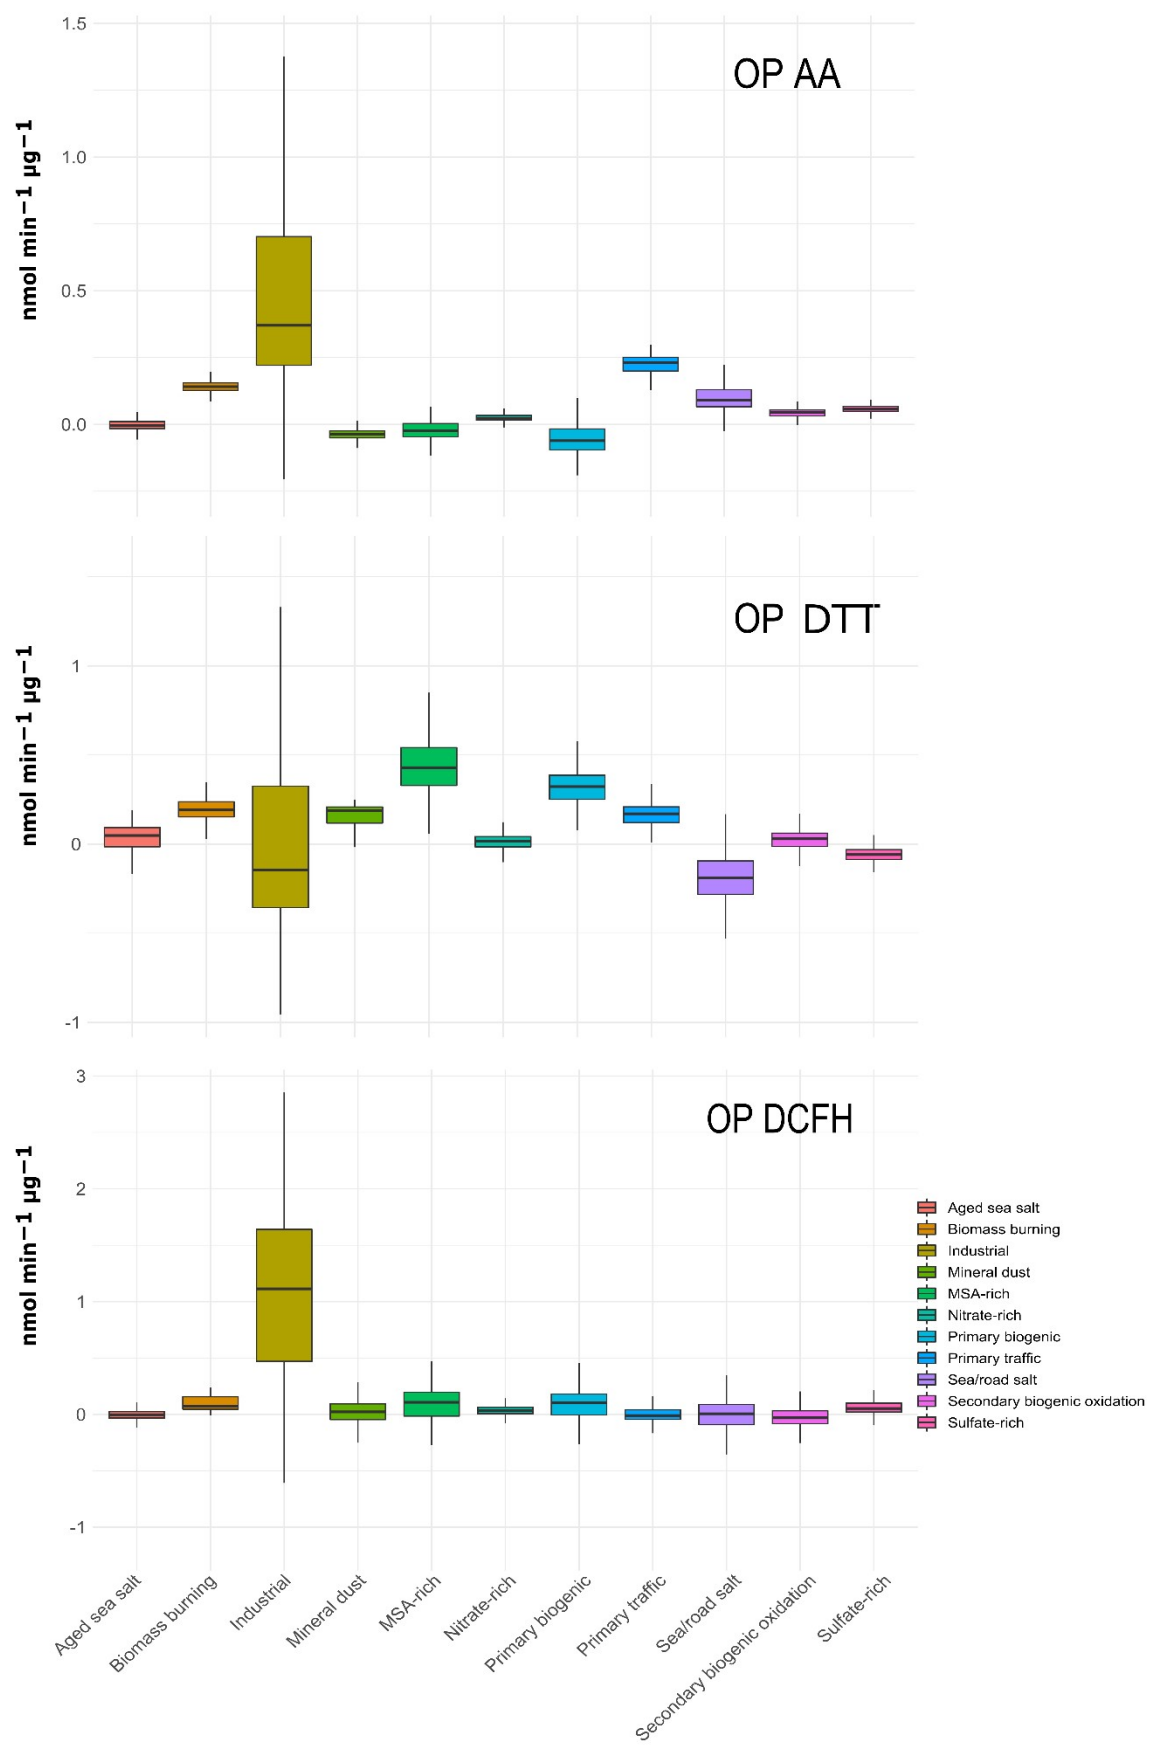

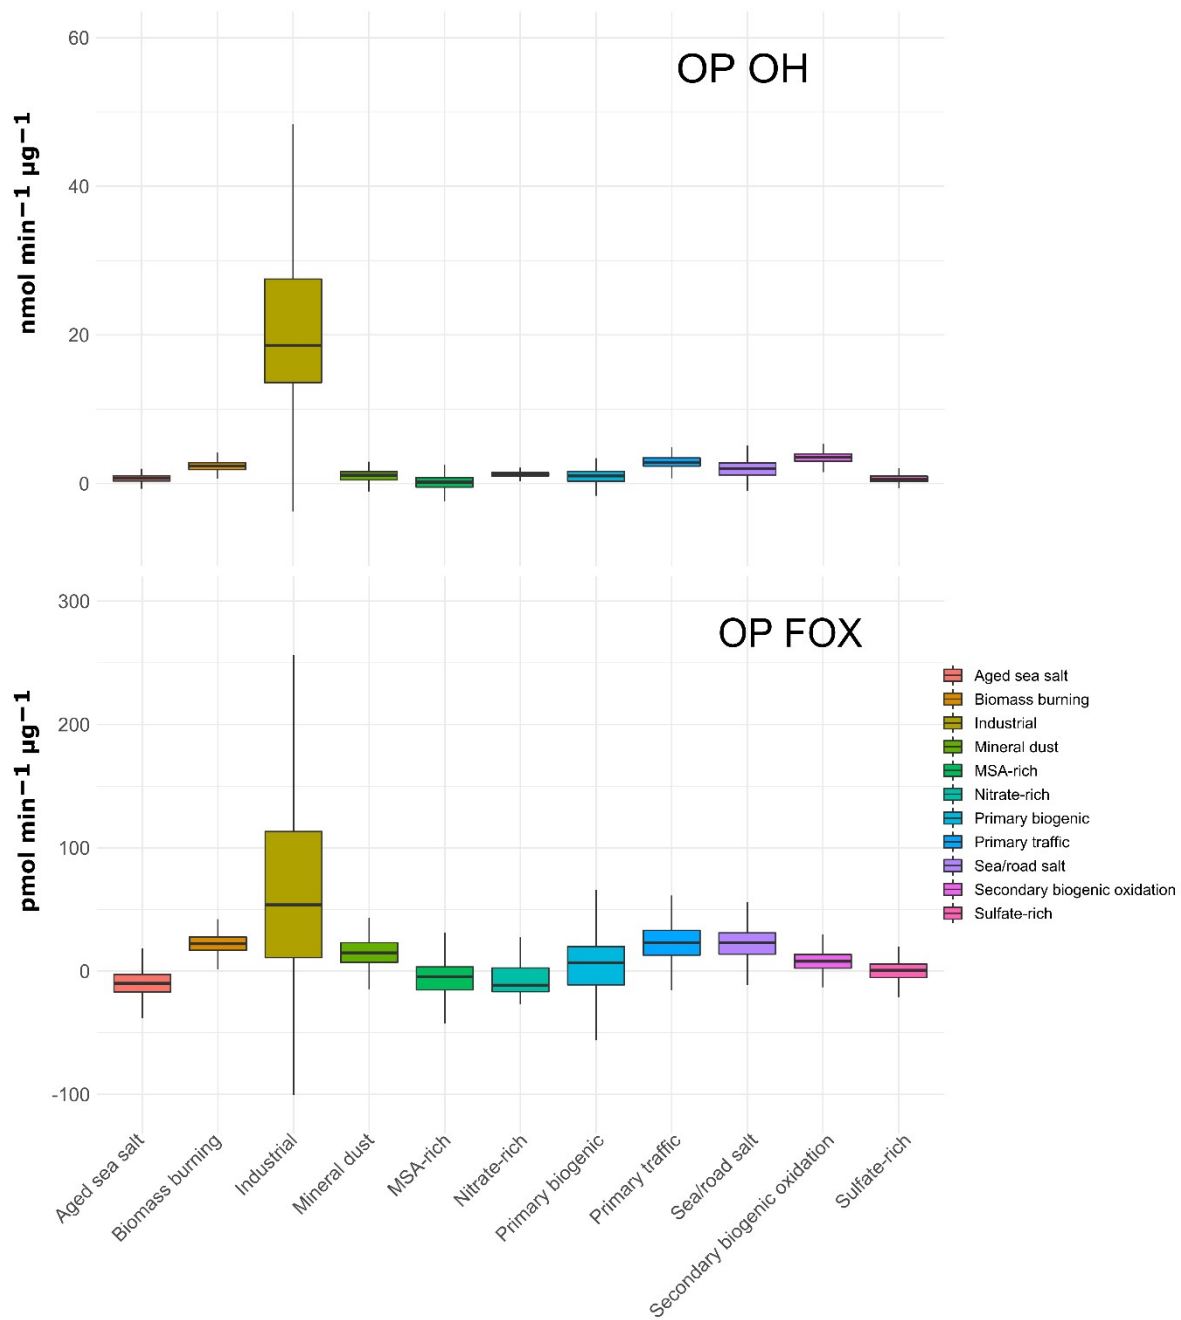

**Figure S4. Box plot of intrinsic OP for each OP assay and each PM10 source obtained from the 500 bootstraps. Each box represents the interquartile values; the bottom and the top show the first and third quartile, respectively, and the black horizontal lines are the median of the distribution.**

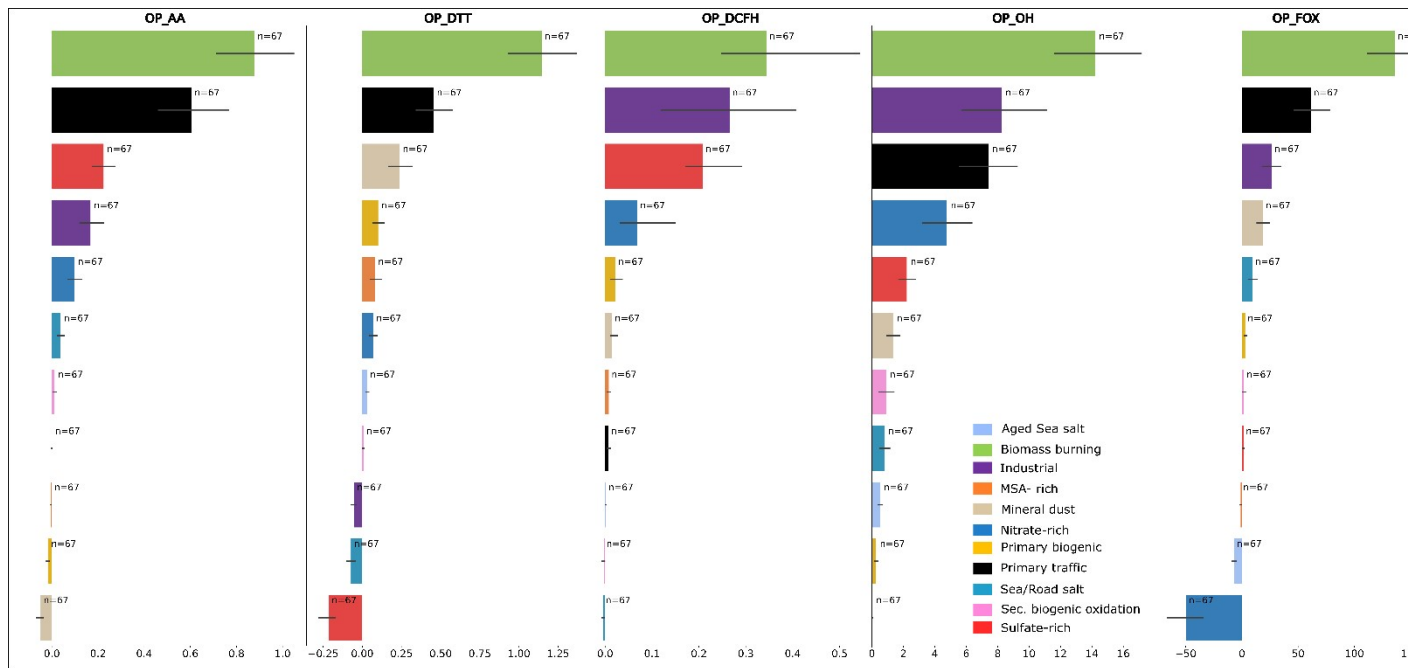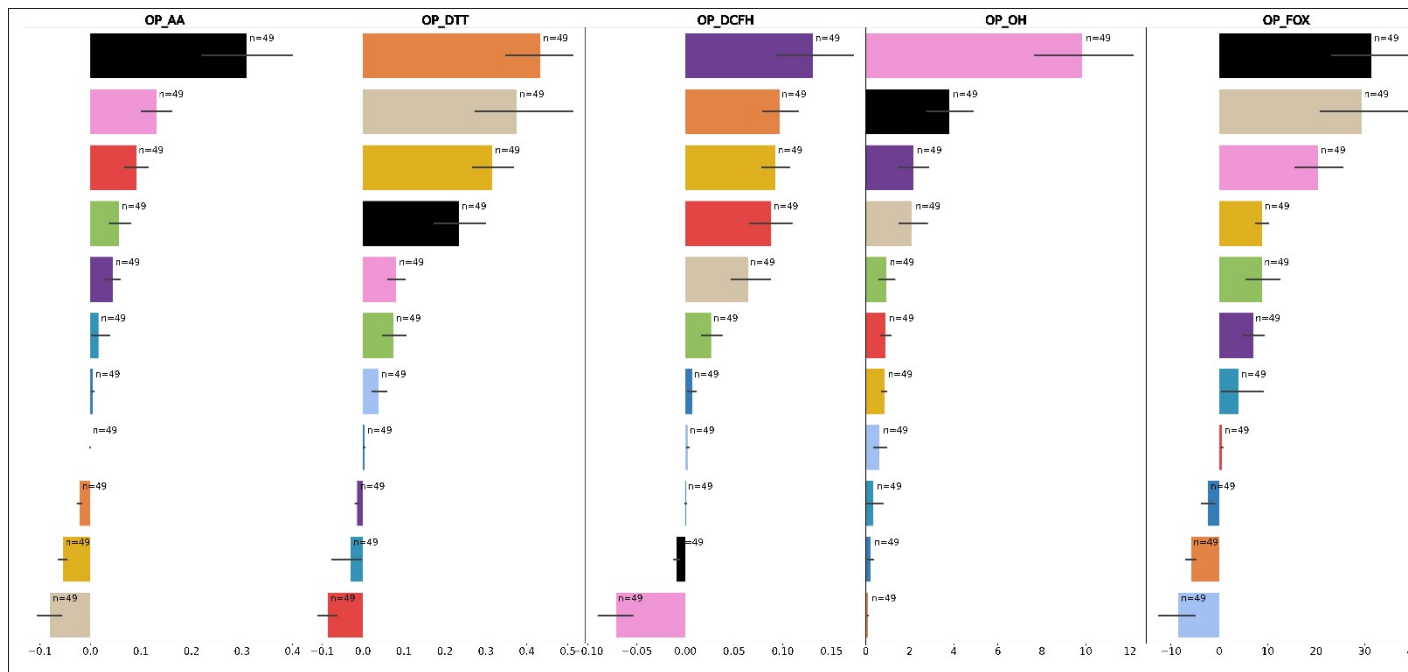

**Figure S5. Median daily contribution of PM<sub>10</sub> sources based on five OPv assays in Grenoble, France. Top: Source-specific OP exposure during cold months, Bottom: Source-specific OP exposure during warm months.**

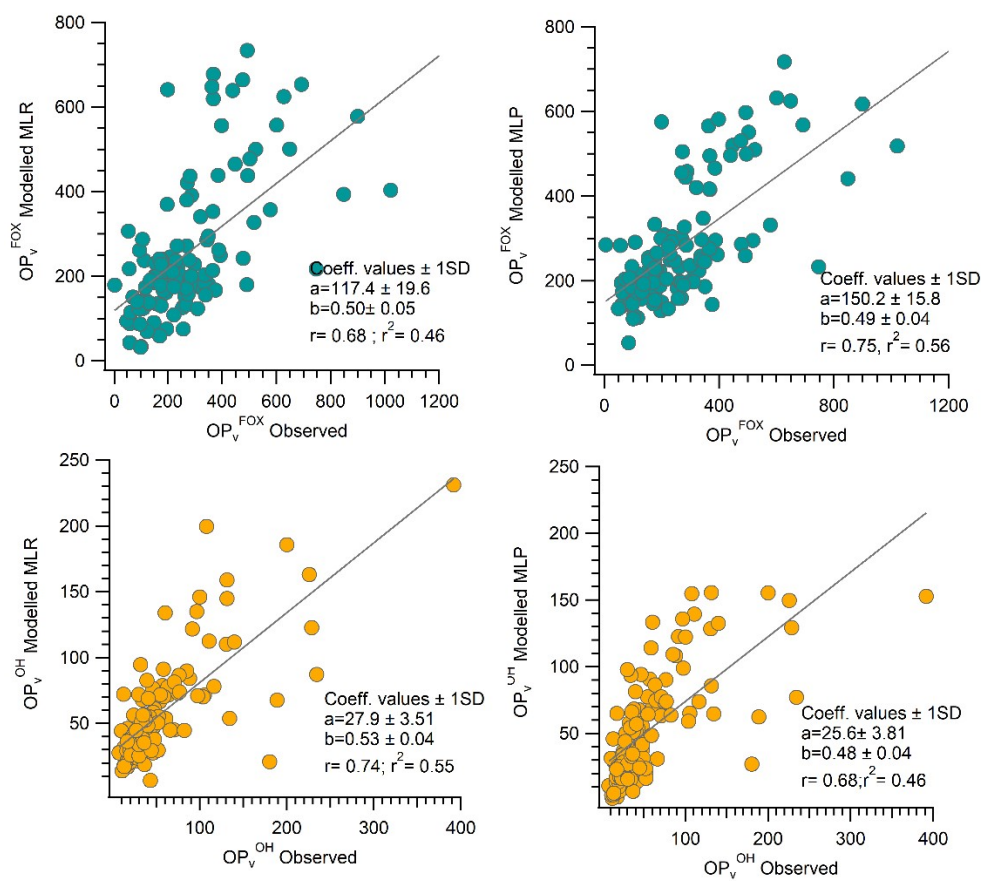

**Figure S6. Scatter plots of  $OP_v^{FOX}$  and  $OP_v^{OH}$  test values observed relative to those obtained by the MLR-WLS model and the MLP model.**



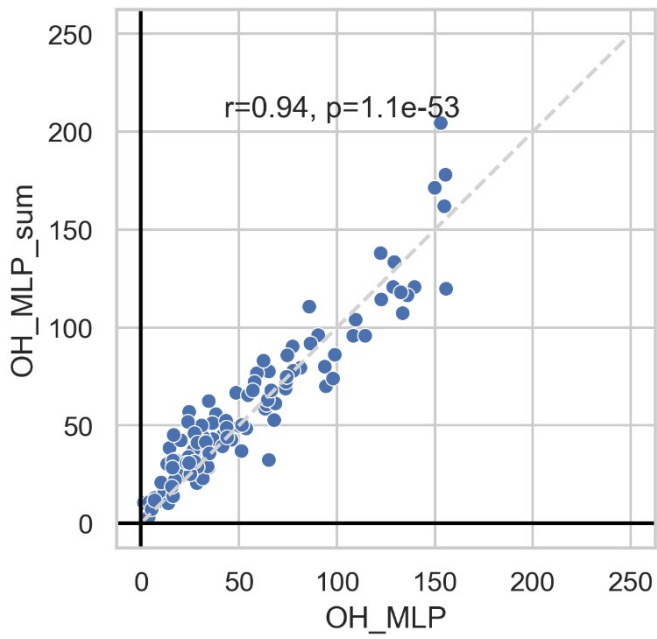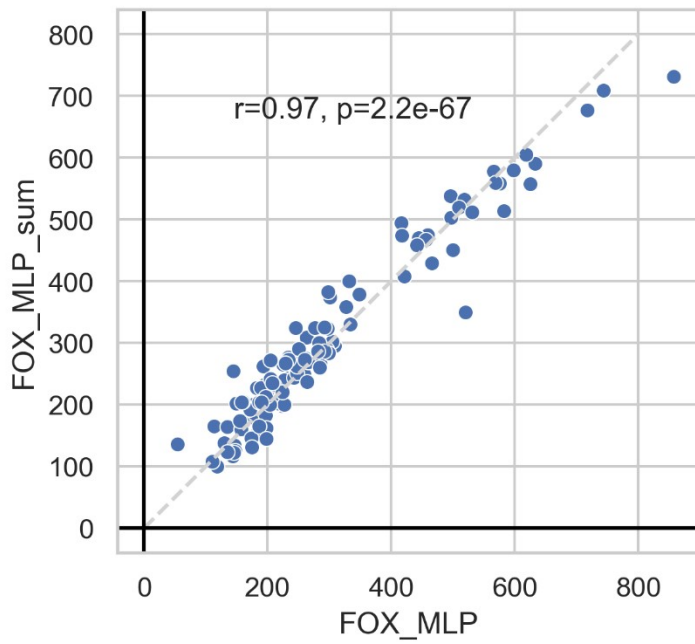

**Figure S7. Comparison of the original modelled OP (MLP) and the sum of source-specific modelled OP activity (MLP\_sum). The dashed grey line corresponds to the 1:1 line. Data points below the 1:1 line show an overall synergistic effect between  $PM_{10}$  sources on OP activity; above the 1:1 line, the antagonist effects.**

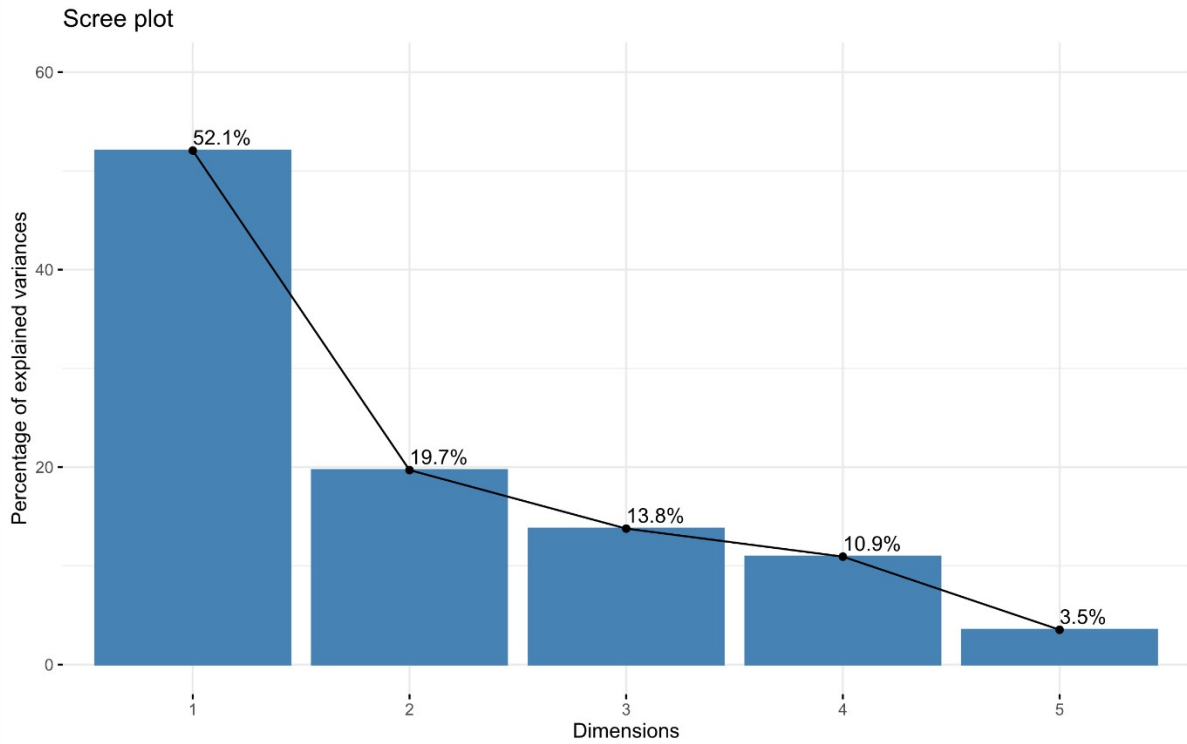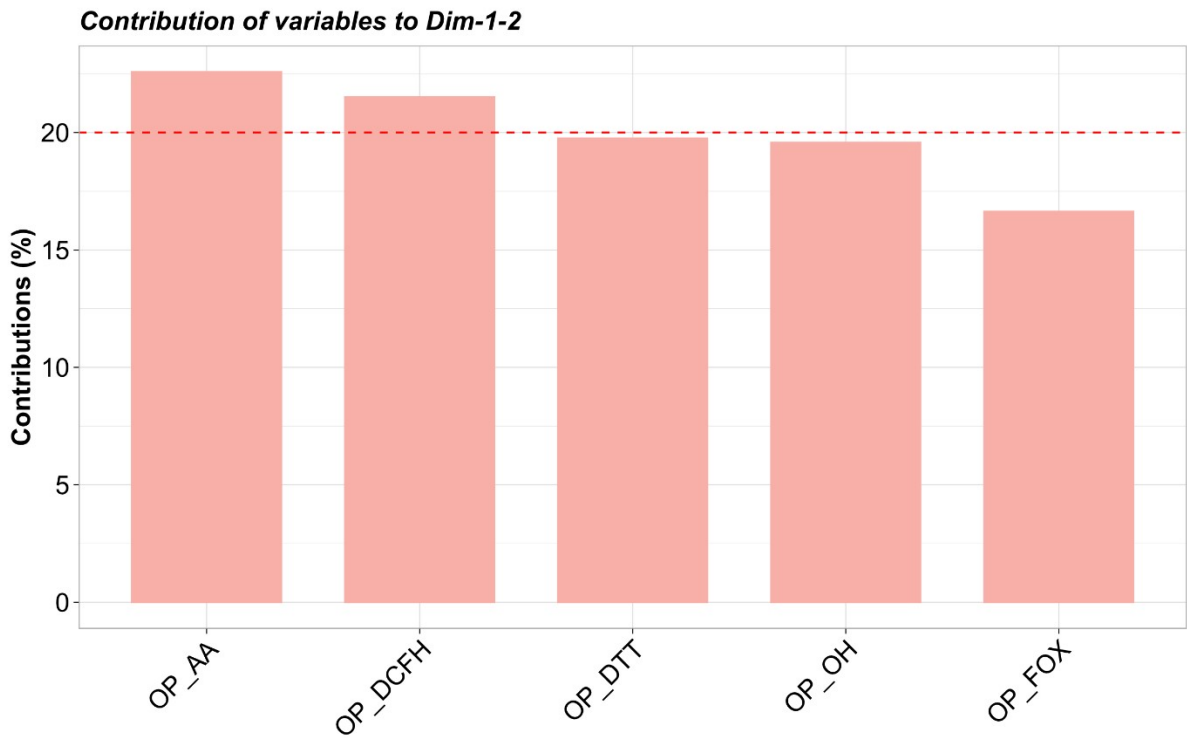

**Figure S8. Top: Scree plot of the explained variances by each principal component (dimensions 1 to 5). Bottom: contribution of each OP assay to the PC1 and PC2, representing 72 % of the total variability.**

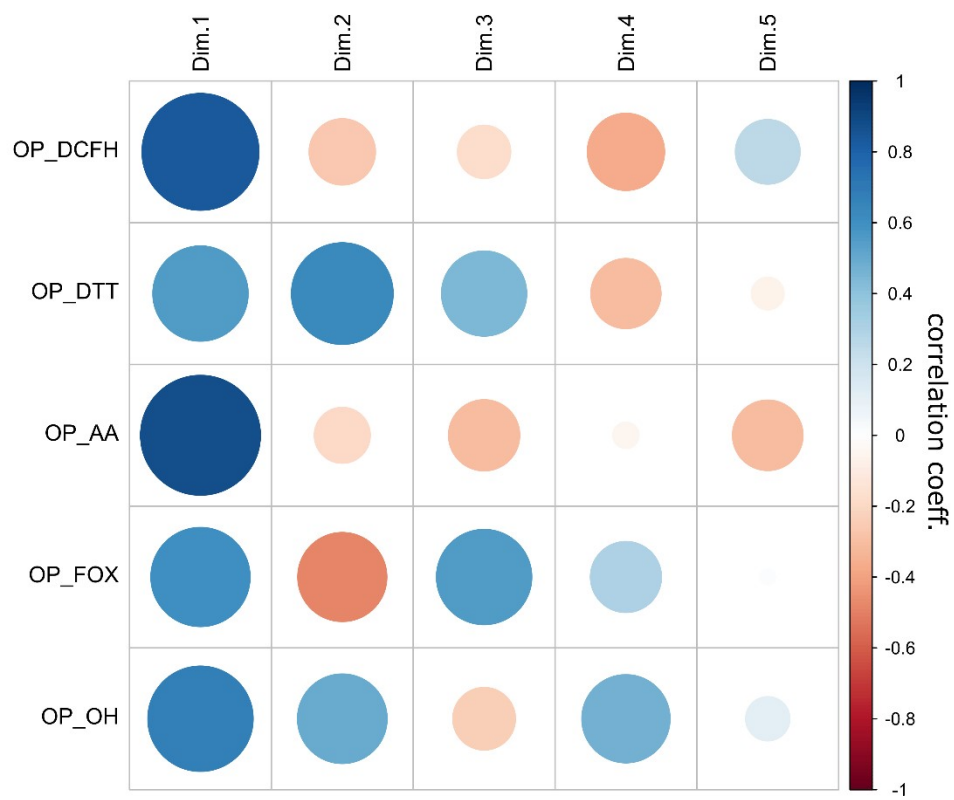

**Figure S9. Correlation matrix between the OP assays and the different dimensions (PC) obtained in the PCA analysis.**
